# Supplementary material for: Meraculous: De Novo Genome Assembly with Short Paired-End Reads
Source: PLoS One. 2011 Aug 18;6(8):e23501. doi: 10.1371/journal.pone.0023501 (PMC3158087; doi:10.1371/journal.pone.0023501)
Supplement: Text S1 — Optimal Choice of . This note presents a formal calculation of the contig-number minimizing choice of the assembly parameter dmin. (DOC) [file pone.0023501.s002.doc]

**Supplemental Text S1.** **Optimal Choice of .**

Instead of an error correction step as performed in other short-read assemblers, we simplify the deBruijn graph by discarding *k*-mers that occur fewer than times in the dataset.  Since the error rate is small, and the depth of coverage so high, this has only a small effect on our ability to assemble.  If is chosen too small, however, many contigs will end at forks (*i.e.*, *k*-mer ends marked F) for which one or more branches are due to errors.  Conversely, if is chosen too large, contigs will end at regions of low coverage (*i.e.*, *k*-mer ends marked X).  With some simple assumptions, we can derive an optimal choice of that minimizes the number of contigs. 
Let the number of *k*-mers of frequency *x* be denoted by *n*(*x*).  We assume that *n*(*x*) can be decomposed into the sum of two contributions, the true genomic *k*-mers of frequency *x*, *t*(*x*), and the erroneous (false) *k*-mers of this frequency,  *f*(*x*).  Thus *n*(*x*) = *t*(*x*)+*f*(*x*).   We may then define the following integrals (assuming that the functions of the discrete variable *x* are smooth):

*T* = total number of true *k*-mers =                            (eq. S1)

*F* = total number of erroneous *k*-mers =                  (eq. S2)

For a given choice of , the number of contig ends (*i.e.*, twice the number of contigs) that are produced will be the sum of two contributions:  those contigs that are prematurely truncated at true *k*-mers whose frequency is less than (contigs ending with X), and those contigs that are prematurely truncated at erroneous *k*-mers whose frequency is greater than(contigs ending with F).  In our simple model, these values are approximated by the integrals:

                                               (eq. S3)
                        (eq. S4)

To minimize the number of contigs, we minimize the sum of these contributions , which can be rewritten using Eqs. S3 and S4 as

                                      (eq. S5)

which is extremal with respect to when the integrand vanishes.   The optimal choice of  is therefore the frequency at which the number of false *k*-mers is equal to the number of true *k*-mers .  In practice, for a given observed mer-frequency distribution this value can be obtained by fitting the low-frequency *k*-mer distribution (*e.g.*, to a power law) and the peak-frequency distribution (*e.g.*, to a Gaussian) independently and finding the intersection point of the two fits.  Due to the sharp crossing of true and false *k*-mers that is typically observed, the common choice of the minimum of the *k*-mer frequency distribution [17] may be a simple and useful approximation, but is distinct from the condition derived here. As discussed in the main text, in practice a lower choice of is preferred since the calculation presented here includes short contigs of length 2*k*-1 centered on errors.
